# Supplementary material for: Outbreak analysis with a logistic growth model shows COVID-19 suppression dynamics in China
Source: PubMed Central journal article supplement (PMC7323941; doi:10.1371/journal.pone.0235247), 2020-06-29
Supplement: pone.0235247.s001.pdf [file pone.0235247.s001.pdf]

9 S1 Appendix. Formula inference

10

$$11 \quad I_t = T_t - \sum_{i=1}^t k I_i - C_t \quad (1)$$

12

$$13 \quad I_{t-1} = T_{t-1} - \sum_{i=1}^{t-1} k I_i - C_{t-1} \quad (2)$$

14 Equation (1) - Equation (2)

$$15 \quad I_t - I_{t-1} = (T_t - T_{t-1}) - (C_t - C_{t-1}) - k I_t$$

$$16 \quad I_t - I_{t-1} + k I_t = (T_t - T_{t-1}) - (C_t - C_{t-1})$$

$$17 \quad I_t + k I_t = (T_t - T_{t-1}) - (C_t - C_{t-1}) + I_{t-1}$$

$$18 \quad I_t (1 + k) = (T_t - T_{t-1}) - (C_t - C_{t-1}) + I_{t-1}$$

19 Therefore,

$$20 \quad I_t = \frac{(T_t - T_{t-1}) - (C_t - C_{t-1}) + I_{t-1}}{1 + k}$$

21

22
