# Supplementary material for: Outbreak analysis with a logistic growth model shows COVID-19 suppression dynamics in China
Source: PubMed Central journal article supplement (PMC7323941; doi:10.1371/journal.pone.0235247), 2020-06-29
Supplement: pone.0235247.s002.pdf [file pone.0235247.s002.pdf]

S1 Table 1. Estimated model parameters per province and for China (excluding Hubei) and other 20 provinces with at least 150 cases of SARS-CoV2

| Region                  | Daily fatality rate (%) | a           | b          | c           | R-squared | a2          | b2         | c2          | R-squared2 |
|-------------------------|-------------------------|-------------|------------|-------------|-----------|-------------|------------|-------------|------------|
| China (excluding Hubei) | 0.05 ± 0.01             | 12882 ± 42  | 14.7 ± 0.1 | 3.91 ± 0.07 | 0.999     | 12558 ± 83  | 31.9 ± 0.1 | 5.43 ± 0.09 | 0.999      |
| Hubei                   | 0.34 ± 0.05             | 67622 ± 463 | 21.3 ± 0.2 | 4.13 ± 0.13 | 0.996     | 55387 ± 556 | 39.6 ± 0.2 | 5.73 ± 0.08 | 0.999      |
| Guangdong               | 0.05 ± 0.03             | 1344 ± 3    | 14 ± 0.1   | 3.52 ± 0.05 | 0.999     | 1304 ± 24   | 32.4 ± 0.4 | 6.19 ± 0.24 | 0.995      |
| Henan                   | 0.17 ± 0.06             | 1270 ± 4    | 13.7 ± 0.1 | 3.47 ± 0.06 | 0.999     | 1288 ± 8    | 29.8 ± 0.1 | 4.62 ± 0.09 | 0.999      |
| Zhejiang                | 0.00 ± 0.00             | 1196 ± 5    | 12.5 ± 0.1 | 3.13 ± 0.09 | 0.997     | 1245 ± 16   | 31.6 ± 0.3 | 6.30 ± 0.18 | 0.997      |
| Hunan                   | 0.02 ± 0.01             | 1018 ± 3    | 12.9 ± 0.1 | 3.50 ± 0.07 | 0.999     | 972 ± 11    | 27.8 ± 0.2 | 5.30 ± 0.17 | 0.997      |
| Anhui                   | 0.02 ± 0.01             | 993 ± 2     | 15.3 ± 0.1 | 3.54 ± 0.04 | 0.999     | 1003 ± 5    | 32.4 ± 0.1 | 4.43 ± 0.06 | 0.999      |
| Jiangxi                 | 0.00 ± 0.00             | 936 ± 3     | 15.1 ± 0.1 | 3.32 ± 0.06 | 0.999     | 938 ± 5     | 31.6 ± 0.1 | 4.61 ± 0.07 | 0.999      |
| Shandong                | 0.04 ± 0.02             | 774 ± 13    | 19.6 ± 0.5 | 6.39 ± 0.40 | 0.979     | 854 ± 39    | 39.6 ± 0.9 | 7.81 ± 0.37 | 0.993      |
| Jiangsu                 | 0.00 ± 0.00             | 635 ± 2     | 13.5 ± 0.1 | 3.89 ± 0.09 | 0.998     | 616 ± 5     | 28.9 ± 0.1 | 4.89 ± 0.12 | 0.998      |
| Chongqing               | 0.05 ± 0.02             | 575 ± 2     | 12.9 ± 0.1 | 4.40 ± 0.09 | 0.998     | 543 ± 9     | 30.8 ± 0.3 | 5.57 ± 0.22 | 0.995      |
| Sichuan                 | 0.03 ± 0.02             | 536 ± 3     | 15.2 ± 0.2 | 4.72 ± 0.14 | 0.996     | 515 ± 9     | 34.7 ± 0.3 | 6.89 ± 0.19 | 0.997      |
| Beijing                 | 0.11 ± 0.05             | 411 ± 2     | 14.2 ± 0.1 | 4.35 ± 0.12 | 0.996     | 330 ± 3     | 31.9 ± 0.2 | 5.92 ± 0.11 | 0.999      |
| Heilongjiang            | 0.15 ± 0.05             | 482 ± 2     | 16.8 ± 0.1 | 3.66 ± 0.06 | 0.999     | 445 ± 6     | 34.7 ± 0.2 | 5.03 ± 0.15 | 0.997      |
| Shanghai                | 0.04 ± 0.03             | 337 ± 1     | 13 ± 0.1   | 3.67 ± 0.06 | 0.999     | 311 ± 2     | 29.4 ± 0.1 | 4.35 ± 0.11 | 0.998      |
| Hebei                   | 0.11 ± 0.05             | 319 ± 2     | 14.9 ± 0.1 | 4.42 ± 0.12 | 0.997     | 315 ± 2     | 29 ± 0.1   | 4.56 ± 0.07 | 0.999      |
| Fujian                  | 0.02 ± 0.02             | 294 ± 2     | 10.9 ± 0.1 | 3.57 ± 0.12 | 0.995     | 307 ± 3     | 31.4 ± 0.2 | 5.45 ± 0.13 | 0.998      |
| Guangxi                 | 0.03 ± 0.02             | 251 ± 1     | 14.2 ± 0.1 | 4.38 ± 0.10 | 0.998     | 255 ± 3     | 35.7 ± 0.2 | 5.96 ± 0.14 | 0.998      |
| Shaanxi                 | 0.03 ± 0.03             | 244 ± 1     | 11.8 ± 0.1 | 3.89 ± 0.09 | 0.997     | 233 ± 2     | 30.1 ± 0.1 | 4.32 ± 0.11 | 0.998      |
| Yunnan                  | 0.07 ± 0.05             | 172 ± 1     | 12.6 ± 0.2 | 3.77 ± 0.19 | 0.988     | 177 ± 2     | 32.5 ± 0.2 | 4.20 ± 0.13 | 0.997      |
| Hainan                  | 0.18 ± 0.09             | 170 ± 1     | 15 ± 0.1   | 4.41 ± 0.12 | 0.996     | 163 ± 1     | 31.4 ± 0.1 | 4.64 ± 0.11 | 0.998      |
