# Supplementary material for: Outbreak analysis with a logistic growth model shows COVID-19 suppression dynamics in China
Source: PubMed Central journal article supplement (PMC7323941; doi:10.1371/journal.pone.0235247), 2020-06-29
Supplement: pone.0235247.s003.pdf [file pone.0235247.s003.pdf]

S1 Fig. 1

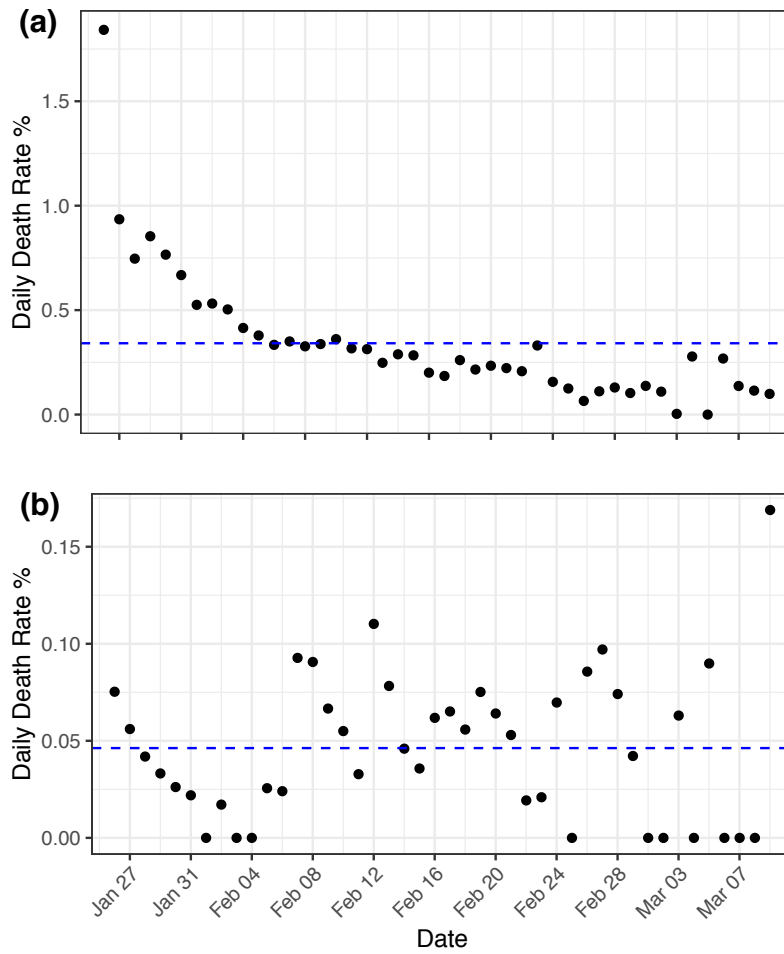

S1 Fig. 1 Daily death rate for Hubei province (a) and China excluding Hubei (b)

5  
6  
7  
8
